# Supplementary material for: Novel Combination of Choline with Withania somnifera (L.) Dunal, and Bacopa monnieri (L.) Wetts Reduced Oxidative Stress in Microglia Cells, Promoting Neuroprotection
Source: MDPI journal article supplement (doi:10.3390/ijms241814038), 2023-09-13
Supplement: s1 [file s1]

## Novel combination of choline with *Withania somnifera* (L.) Dunal, and *Bacopa monnieri* (L.) Wetts reduced oxidative stress in microglia cells, promoting neuroprotection.

Vittoria Borgonetti <sup>1</sup> and Nicoletta Galeotti <sup>1\*</sup>

<sup>1</sup> Department of Neuroscience, Psychology, Drug Research, and Child Health (NEUROFARBA), Section of Pharmacology, University of Florence, Viale G. Pieraccini 6, Florence, 50139, Italy

\* Correspondence: Corresponding author: Prof.ssa Nicoletta Galeotti; [nicoletta.galeotti@unifi.it](mailto:nicoletta.galeotti@unifi.it)

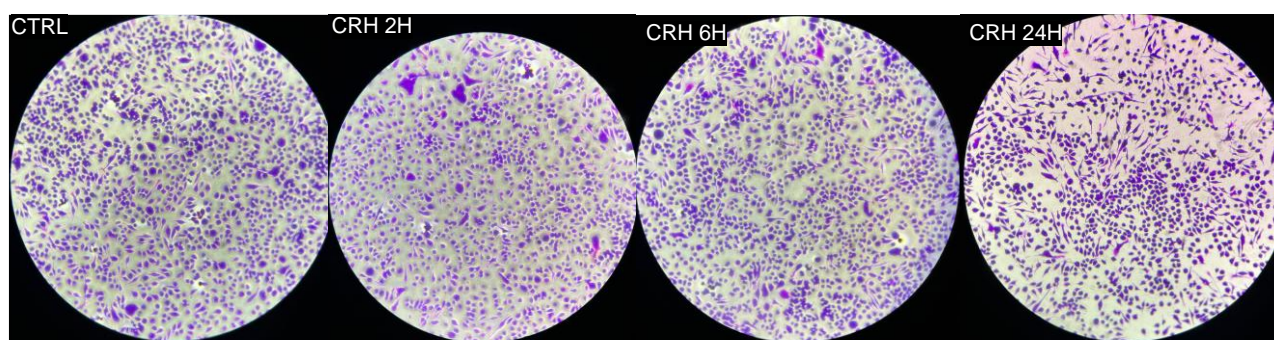

Figure S1: Uncropped images of Figure 1B

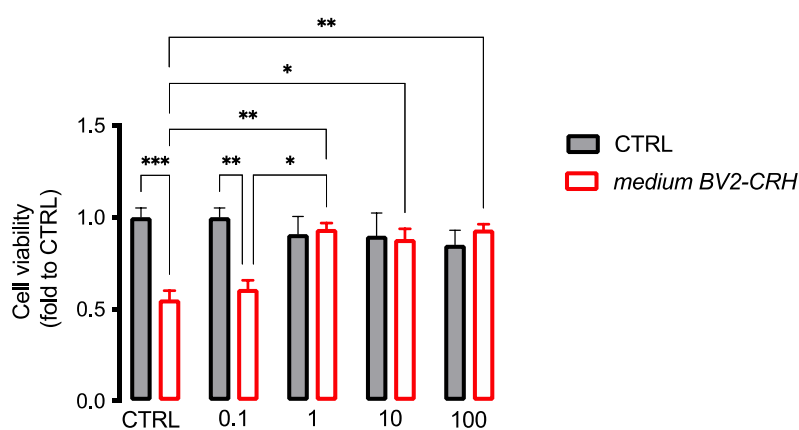

Figure S2 Evaluation of CBW 0.1, 1, 10 and 100  $\mu$ M pre-treatment in SHSY5Y in basal (gray) and after medium BV2 stimulated with CRH (red). Two-way ANOVA \*\*\* $p < 0.001$  \*\* $p < 0.01$  \* $p < 0.05$

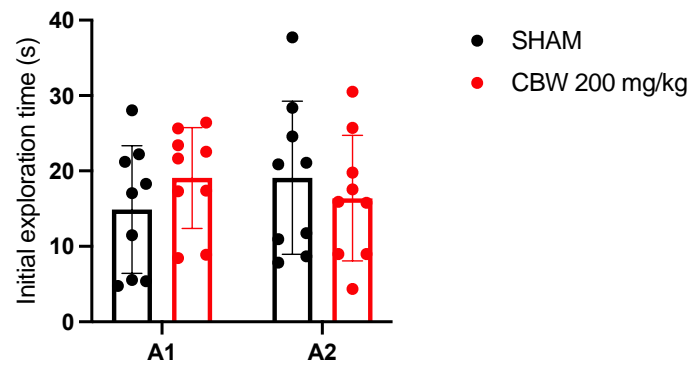

**Figure S3** Initial exploration time of SHAM and CBW 200 mg/kg group, recorded during Test Day 1 of NORT test.
